# Supplementary material for: Low temperature synthesis of copper telluride nanostructures: phase formation, growth, and electrical transport properties
Source: Royal Society of Chemistry journal article supplement (doi:10.1039/c2jm16486h), 2012-01-01
Supplement: c2jm16486h.pdf [file c2jm16486h.pdf]

## Supplementary Information

### Low Temperature Synthesis of Copper Telluride Nanostructures: Phase Formation, Growth and Electrical Transport Properties

*Ching-Chun Lin, Wei-Fan Lee, Ming-Yen Lu, Szu-Ying Chen, Min-Hsiu Hung, Tsung-Cheng Chan, Hung-Wei Tsai, Yu-Lun Chueh\*, and Lih-Juann Chen\**

Department of Materials Science & Engineering, National Tsing Hua University, No. 101, Sec. 2, Kuang-Fu Rd., Hsinchu 30013, Taiwan, Republic of China

e-mail: ljchen@mx.nthu.edu.tw and ylchueh@mx.nthu.edu.tw

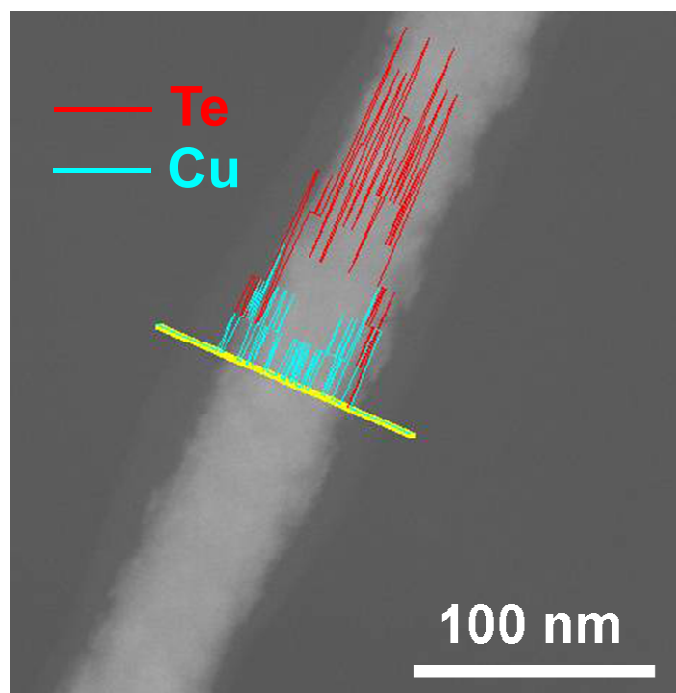

FIGURE S1 Elemental line profiles of Te/Cu core shell nanowire.

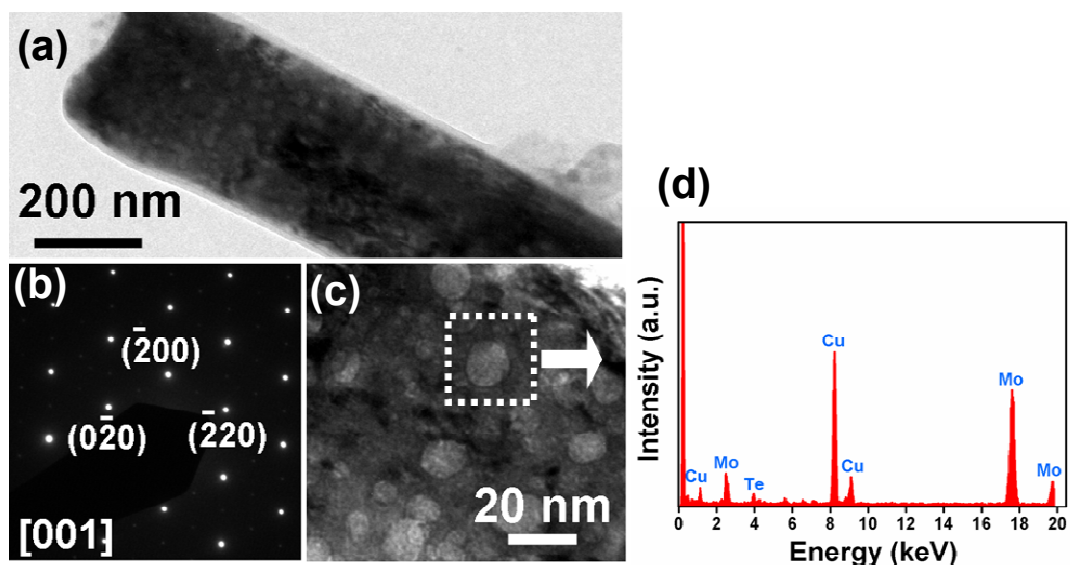

FIGURE S2. (a) Low magnification TEM image of a  $\text{Cu}_2\text{Te}/\text{Cu}$  nanobelt. (b) Corresponding selected diffraction pattern with [001] zone axis. (c) High magnification TEM image taken from an area in (a). (d) EDS spectrum provides evidence for the coating of Cu nanoparticles on the surface of the  $\text{Cu}_2\text{Te}$  nanobelt.

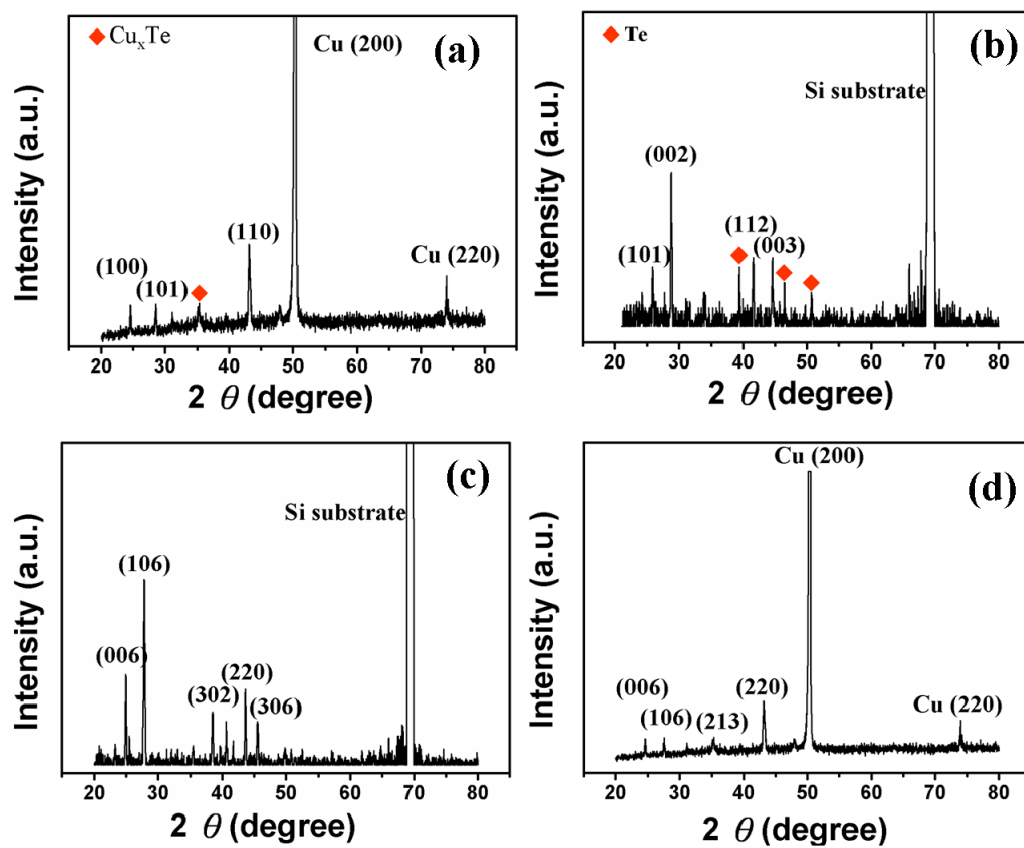

FIGURE S3. XRD spectra of (a) Te/Cu core/shell nanowires, (b)  $\text{Cu}_3\text{Te}_2$  nanowires, (c)  $\text{Cu}_2\text{Te}$  nanowires, and (d)  $\text{Cu}_2\text{Te}$  nanobelts with Cu NPs.<sup>1-3</sup>

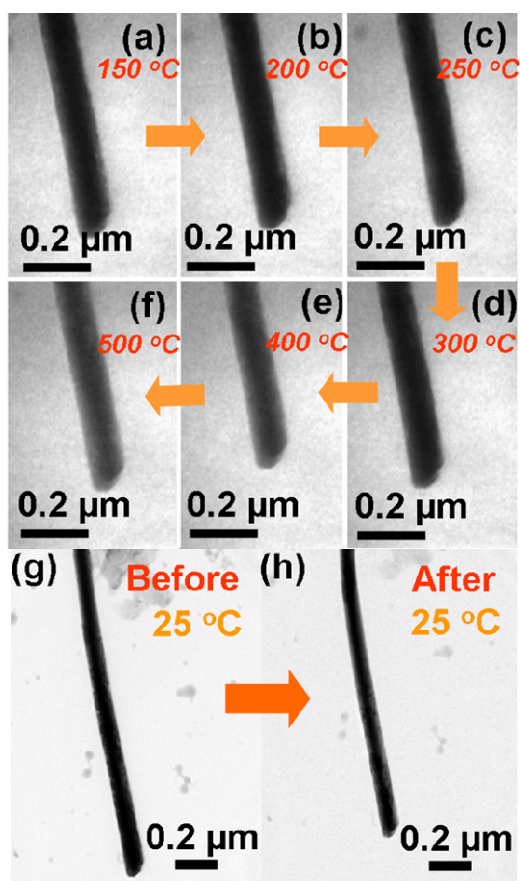

FIGURE S4. *In-situ* TEM images of a  $\text{Cu}_2\text{Te}$  nanowire at annealing temperatures ranging from (a) 150 °C, (b) 200 °C, (c) 250 °C, (d) 300 °C, (e) 400 °C to (f) 500 °C. The TEM images at room temperature before and after annealing were also shown in (g) and (h), respectively.

## References

- (1) R. Keller, W. B. Holzappel, and Heinz Schulz, *Phys. Rev. B*, **1977**, *16*, 4404-4412
- (2) A. L. N. Stevels, G.A. Wiegers, *Recl. Trav. Chim. Pays-Bas*, **1971**, *90*, 352-259
- (3) Ghomari-Bouanani, H et al. *Mater. Res. Bull.*, **1993**, *28*, 901-908
